# Supplementary material for: Mixing State of Refractory Black Carbon of the North China PlainRegional Aerosol Combining a Single Particle Soot Photometer anda Volatility Tandem Differential Mobility Analyzer
Source: Copernicus journal article supplement (doi:10.5194/acp-2017-222), 2017-04-19
Supplement: Supplementary file 1 [file acp-2017-222-supplement.pdf]

1 *Supplement of*  
2 **Mixing State of Refractory Black Carbon of the North China Plain**  
3 **Regional Aerosol Combining a Single Particle Soot Photometer and a**  
4 **Volatility Tandem Differential Mobility Analyzer**

5  
6 **Yuxuan Zhang<sup>1,2</sup>, Hang Su<sup>3,2</sup>, Simonas Kecorius<sup>4</sup>, Zhibin Wang<sup>4,2</sup>, Min Hu<sup>5</sup>, Tong Zhu<sup>5</sup>,**  
7 **Kebin He<sup>6</sup>, Alfred Wiedensohler<sup>4</sup>, Qiang Zhang<sup>1</sup> and Yafang Cheng<sup>3,2</sup>**

8 <sup>1</sup>Ministry of Education Key Laboratory for Earth System Modeling, Department of Earth System  
9 Science, Tsinghua University, Beijing 100084, China

10 <sup>2</sup>Multiphase Chemistry Department, Max Planck Institute for Chemistry, Mainz 55020, Germany

11 <sup>3</sup>Institute for Environmental and Climate Research, Jinan University, Guangzhou 510630, China

12 <sup>4</sup>Leibniz-Institute for Tropospheric Research, Leipzig 04318, Germany

13 <sup>5</sup>State Key Joint Laboratory of Environmental Simulation and Pollution Control, College of  
14 Environmental Sciences and Engineering, Peking University, Beijing 100871, China

15 <sup>6</sup>State Key Joint Laboratory of Environment Simulation and Pollution Control, School of  
16 Environment, Tsinghua University, Beijing 100084, China

17 Correspondence to Y. F. Cheng (yafang.cheng@mpic.de) and H. Su (h.su@mpic.de)

18

1

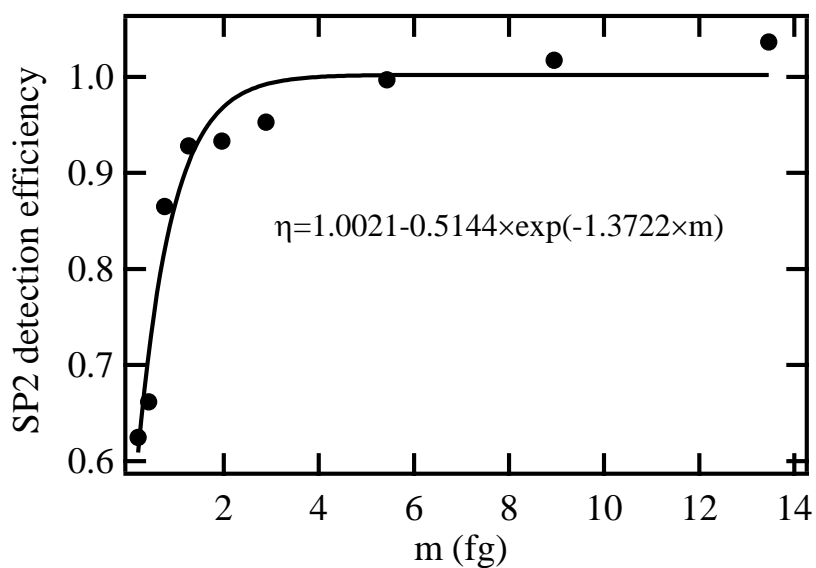

2

3 Figure S1. The SP2 detection efficiencies ( $\eta$ ) in each rBC mass-bin.

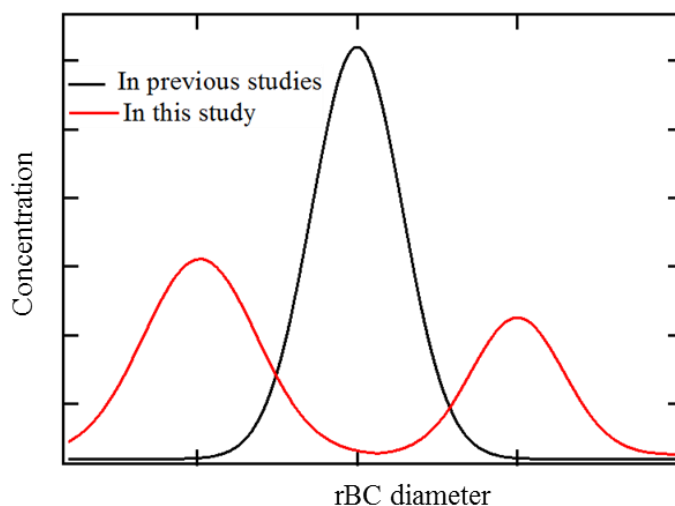

4

5 Figure. S2. Example of rBC size distribution derived by SP2 measurement in previous  
6 studies and in this study. In previous studies of SP2 measurement, the rBC diameter  
7 were generally derived from BC material density (e.g.  $1.8 \text{ g/cm}^3$ ) (black curve). In this  
8 study, the rBC diameter was calculated by different effective densities for  
9 externally- and internally-mixed particles (red curve).

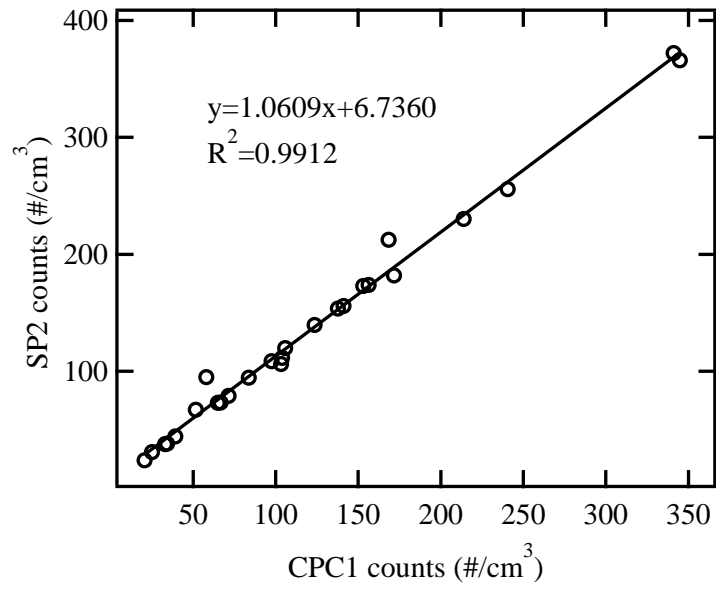

1

2 Figure. S3. Comparison of the counting numbers using SP2 and CPC1 measurement  
3 for total particles with mobility size of 200-350nm.
